# Supplementary material
Source: MDPI journal article supplement (https://www.mdpi.com/2073-4395/11/10/1965)
Supplement: s1 [file s1]

#### S4. Description of the attributes in the choice experiment.

| Attribute                                    | Pictogram                                                                           | Description                                                                                                                                                                           | Levels                                                                         |
|----------------------------------------------|-------------------------------------------------------------------------------------|---------------------------------------------------------------------------------------------------------------------------------------------------------------------------------------|--------------------------------------------------------------------------------|
| Degree of automation of the technology       |    | Degree to which the technology is automated or needs input from the farmer, e.g. in terms of own reasoning, data analysis, insertion of data into the board computer of the spreader. | Non-automated<br>Partly automated<br>Fully automated                           |
| Potential increase in yields                 |    | Increase in average annual crop yields that potentially comes with the adoption of the technology.                                                                                    | No change<br>+ 3 %<br>+ 5 %                                                    |
| Potential reduction in use of fertilizer     |   | Reduction in average annual use of fertilizer that potentially comes with the adoption of the technology                                                                              | No change<br>- 5 %<br>- 10 %                                                   |
| Potential improvement of groundwater quality |  | Improvement of groundwater quality that potentially comes with the adoption of the technology                                                                                         | No change<br>Moderate<br>Strong                                                |
| Personal advice included                     |  | Free personal advice by independent farm advisor is included in the purchase of the technology                                                                                        | No advice<br>Free advice                                                       |
| Cost of technology adoption                  |  | One-time upfront cost of adopting the technology.<br><br>For the non-automated technology, the one-time cost cover a 5-years license for using the technology.                        | 1.000 EUR<br>5.000 EUR<br>10.000 EUR<br>25.000 EUR<br>50.000 EUR<br>75.000 EUR |
