# Supplementary material
Source: MDPI journal article supplement (https://www.mdpi.com/2073-4395/11/10/1965)
Supplement: s1 [file s1]

S3. Example choice card as shown to the respondents.

|                                              | Option A                                                                                                      | Option B                                                                                                         | Option C                                                                                                          | None of the three options |
|----------------------------------------------|---------------------------------------------------------------------------------------------------------------|------------------------------------------------------------------------------------------------------------------|-------------------------------------------------------------------------------------------------------------------|---------------------------|
| Degree of automation of the new technology   | Non-automated technology<br> | Partly automated technology<br> | Fully automated technology<br> | No technology             |
| Potential increase in yields                 |                              |                                 |                                | No increase               |
| Potential reduction in use of fertilizer     |                              |                                 |                                | No reduction              |
| Potential improvement of groundwater quality | No change<br>              | Strong<br>                    | Moderate<br>                 | No change                 |
| Personal advice included                     |                            |                               |                              | No advice                 |
| Cost of technology adoption                  | <br>1.000 EUR              | <br>25.000 EUR                | <br>75.000 EUR               | No costs                  |

If you could choose between these options, which option would you choose?

Option A ☐

Option B ☐

Option C ☐

None ☐
